# Supplementary material
Source: PubMed Central journal article supplement (PMC341836)

Keratin 14

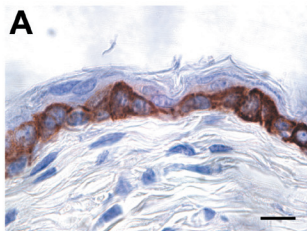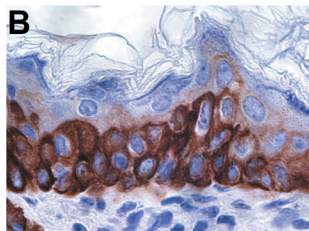

Keratin 10

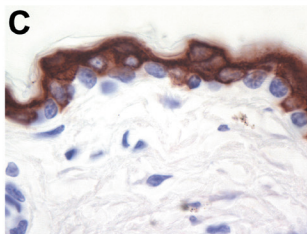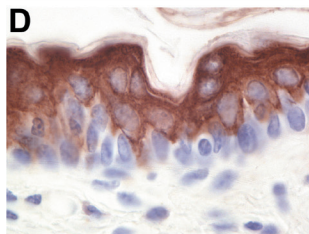

Loricrin

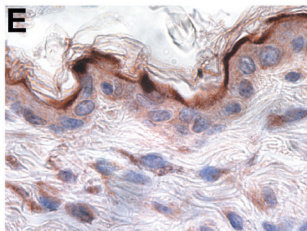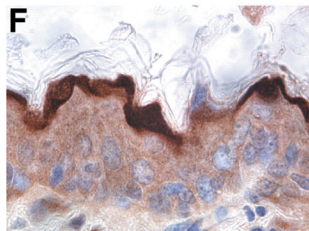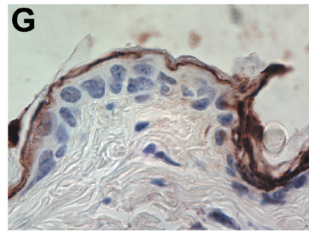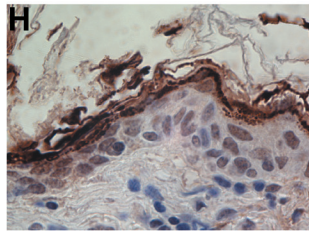

Filaggrin

Keratin 14/Ki67

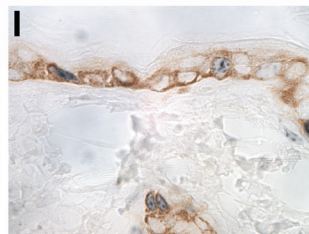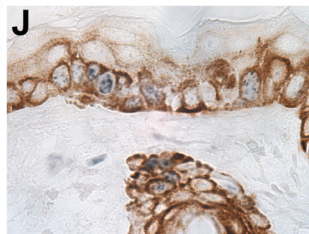

K

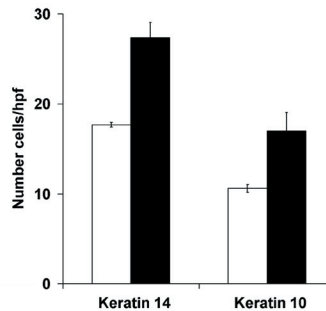

Supplement: pnas_0308217100_3.pdf [file pnas_0308217100_3.pdf]

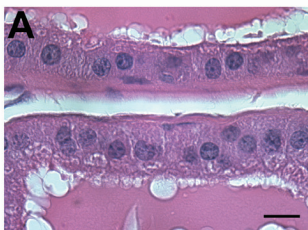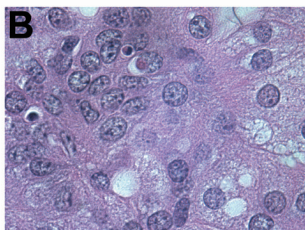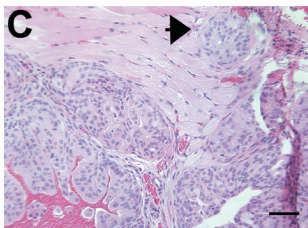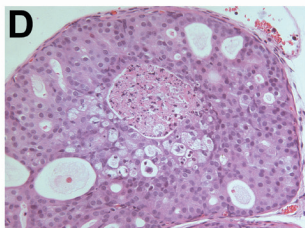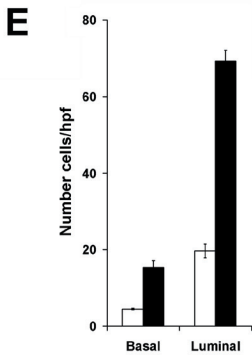

Supplement: pnas_0308217100_5.pdf [file pnas_0308217100_5.pdf]

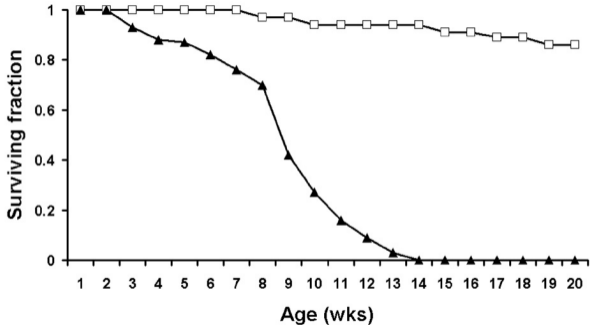

Supplement: pnas_0308217100_7.pdf [file pnas_0308217100_7.pdf]
